# Supplementary figures and images for: Virus-Host Dynamics in Archaeal Groundwater Biofilms and the Associated Bacterial Community Composition
Source: MDPI journal article supplement (doi:10.3390/v15040910), 2023-03-31

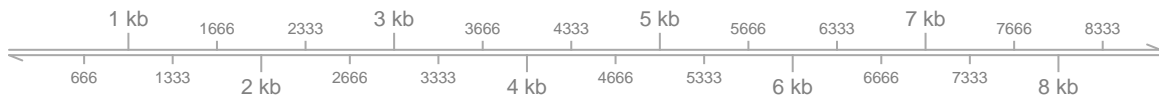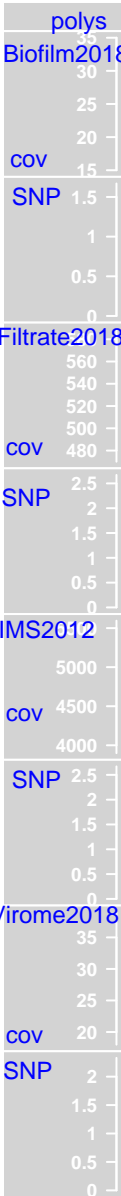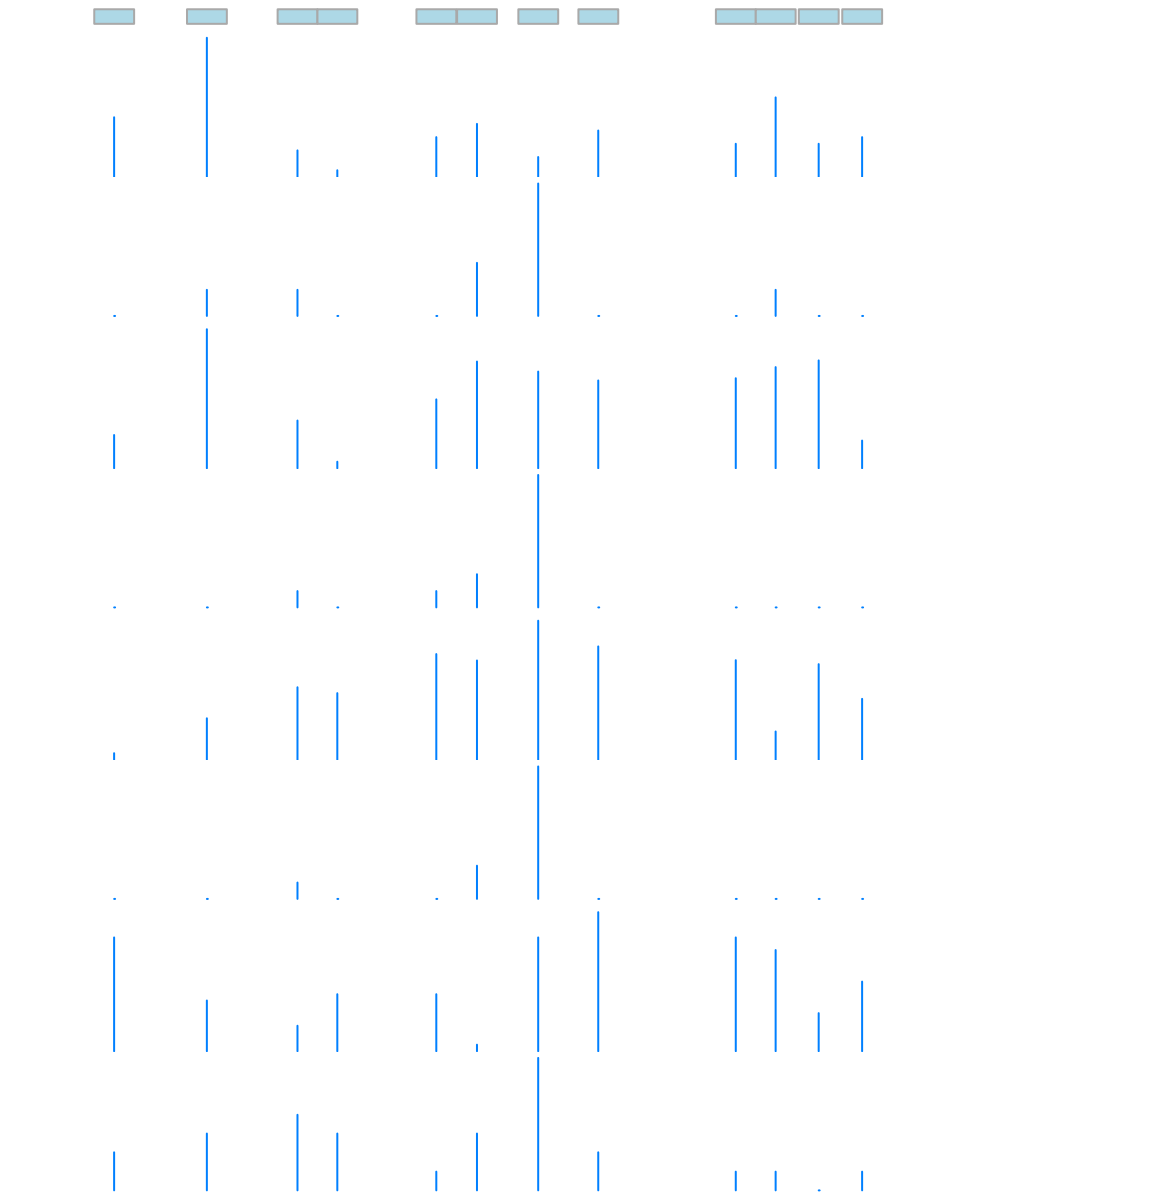

Supplement: s1 [file s1]
